# Supplementary material for: Optimization of Infrared Heating Conditions for Precooked Cowpea Production Using Response Surface Methodology
Source: MDPI journal article supplement (doi:10.3390/molecules26206137), 2021-10-11
Supplement: s1 [file s1]

## Supplementary Figure

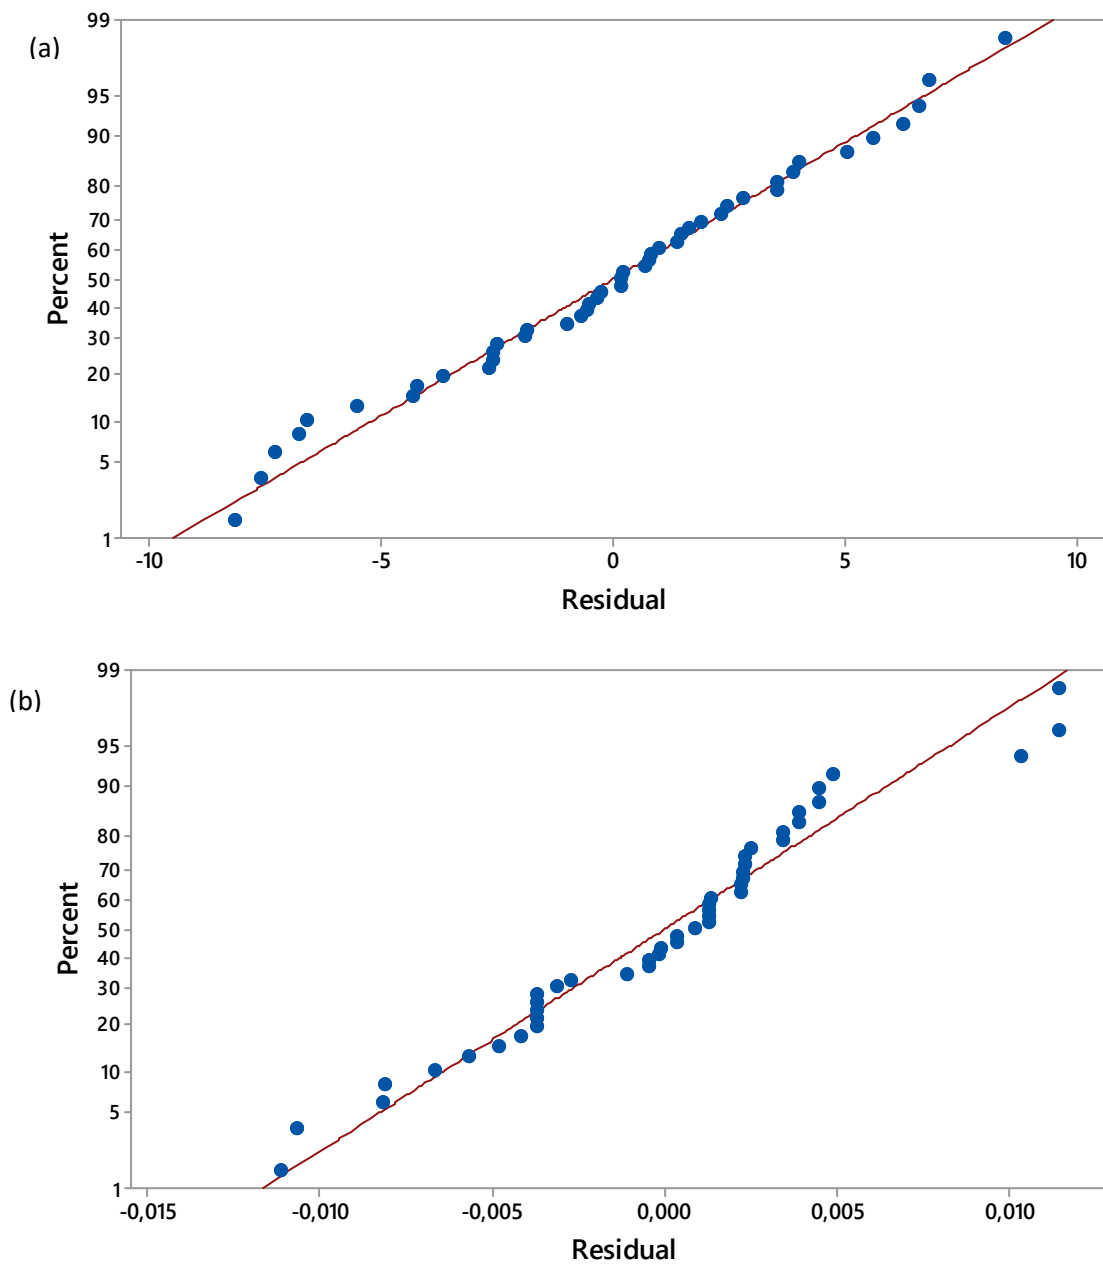

Figure S1: Normal distribution of residuals (a) Water absorption capacity and (b) Bulk density.
